# Supplementary material for: Nano-enabled dynamically responsive living acellular hydrogels
Source: Royal Society of Chemistry journal article supplement (doi:10.1039/d4mh00922c), 2024-10-25
Supplement: d4mh00922c1.pdf [file d4mh00922c1.pdf]

## Supplementary Information

### Nano-Enabled Dynamically Responsive Living Acellular Hydrogels

Roya Koshani,<sup>1</sup> Sina Kheirabadi,<sup>1</sup> Amir Sheikhi<sup>1,2,3,4,5\*</sup>

<sup>1</sup>Department of Chemical Engineering, The Pennsylvania State University, University Park, PA 16802, USA

<sup>2</sup>Department of Biomedical Engineering, The Pennsylvania State University, University Park, PA 16802, USA

<sup>3</sup>Department of Chemistry, The Pennsylvania State University, University Park, PA 16802, USA

<sup>4</sup>Huck Institutes of the Life Sciences, The Pennsylvania State University, University Park, PA 16802, USA

<sup>5</sup>Department of Neurosurgery, College of Medicine, The Pennsylvania State University, Hershey, PA 17033, USA

\*Corresponding authors: [sheikhi@psu.edu](mailto:sheikhi@psu.edu)

The SI includes 6 Figures (S1-S6).

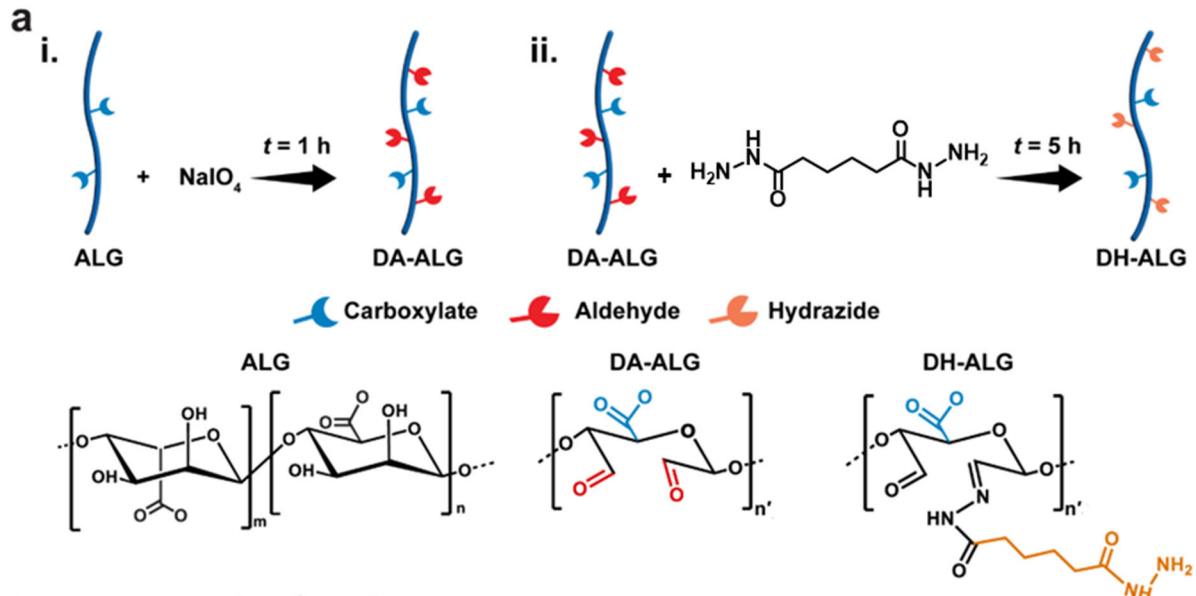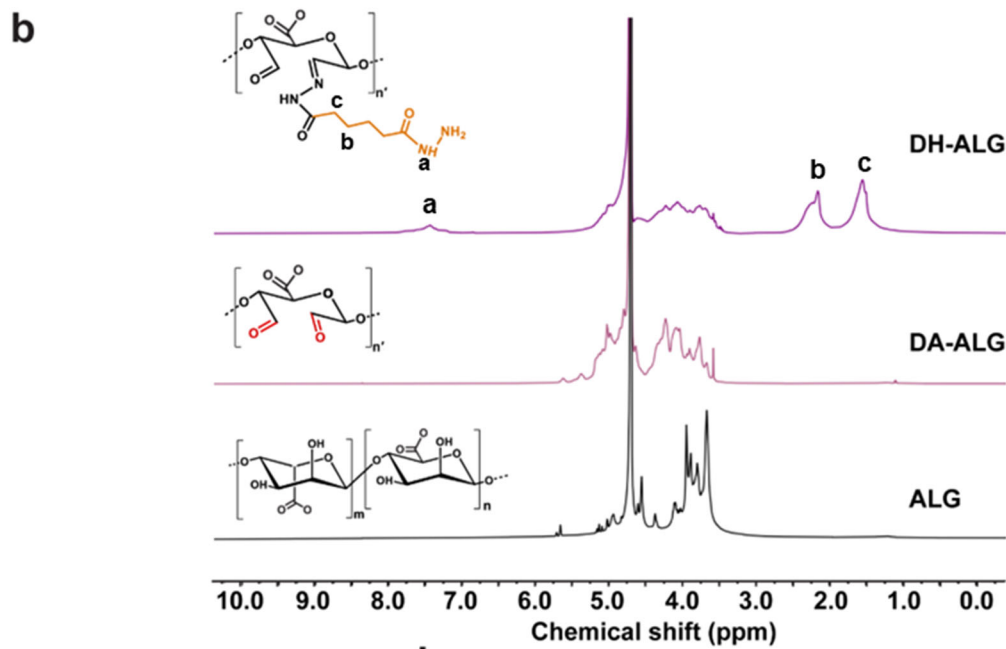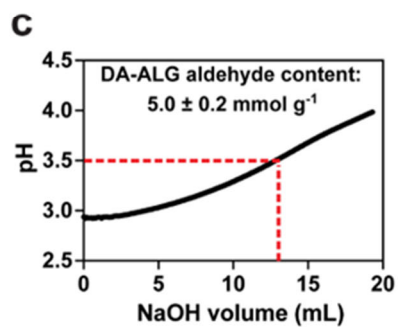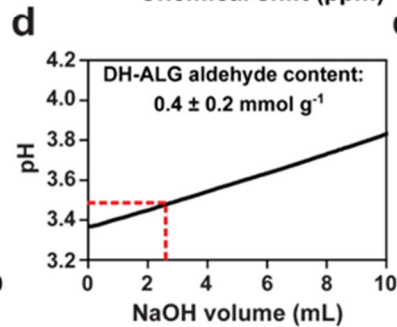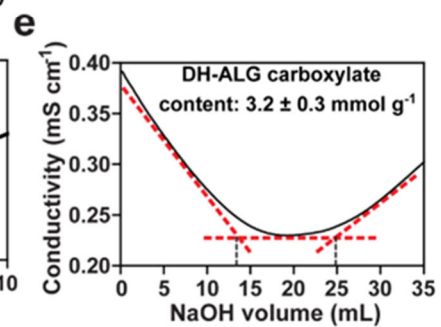

**Fig. S1. DH-ALG synthesis and characterizations.** (a) DH-ALG synthesis via successive periodate oxidation and Schiff base reaction, along with the corresponding changes in ALG chemical structure. Note that the chemical structures are just representatives of functionalization. (b)  $^1\text{H}$  NMR spectra of ALG, DA-ALG, and DH-ALG, confirming the successful functionalization of ALG with aldehyde and hydrazide groups. (c) Aldehyde group content of DA-ALG, determined by the NaOH-titration of HCl released from the reaction of aldehyde groups with  $\text{NH}_2\text{OH}\cdot\text{HCl}$ . (d) Conductometric titration curve of DH-ALG based on the titration of weak acid (i.e., carboxylate) using NaOH, yielding a carboxylate group content of  $3.2 \text{ mmol g}^{-1}$ .

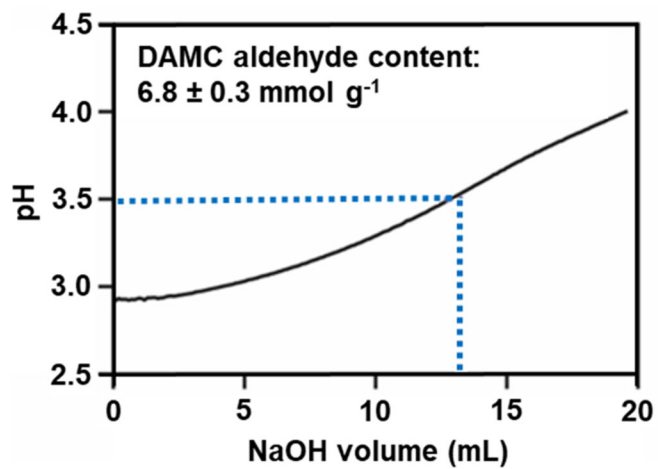

**Fig. S2. Representative aldehyde titration curve of DAMC**, obtained via an oxime formation method.

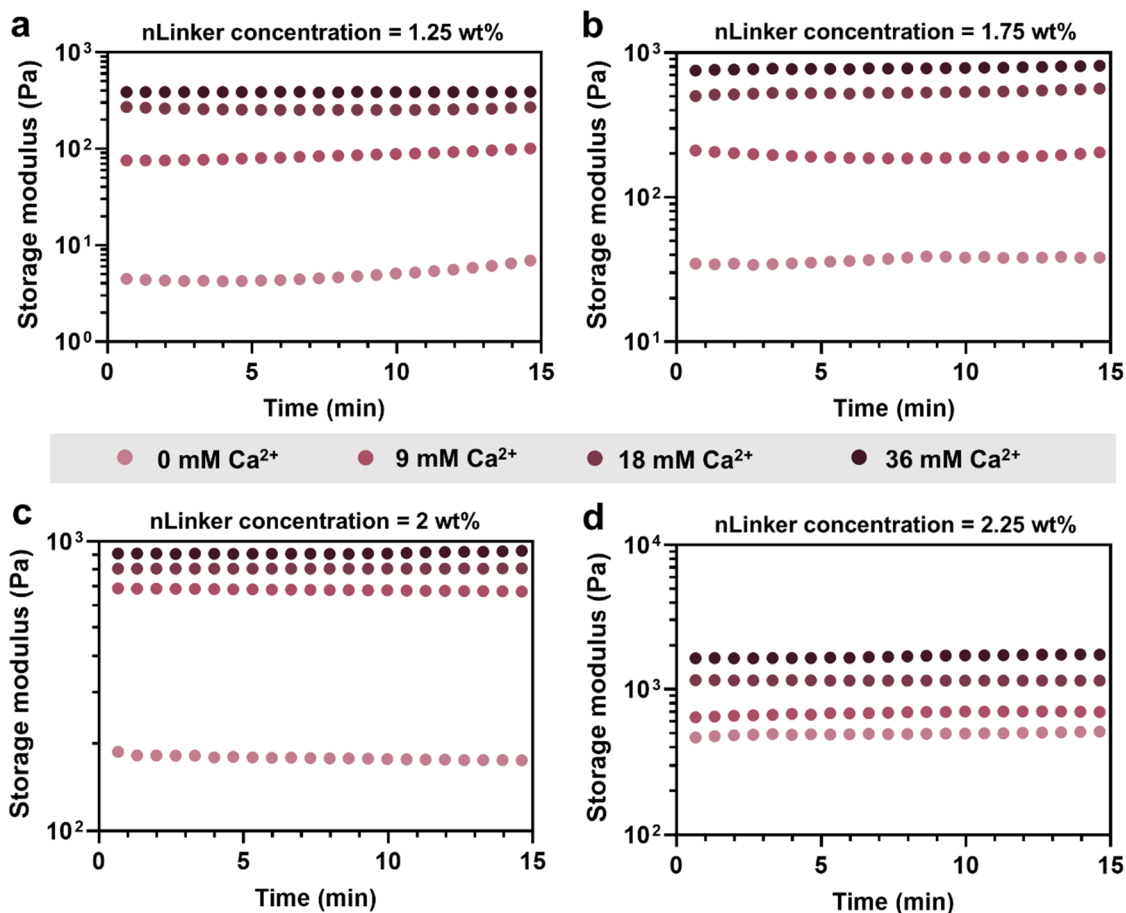

**Fig. S3. Effect of time on the storage modulus of NCH**, containing varying concentrations of nLinker (**a**: 1.25 wt%, **b**: 1.75 wt%, **c**: 2 wt%, **d**: 2.25 wt%) and Ca<sup>2+</sup>, at constant frequency = 1 rad s<sup>-1</sup> and strain = 0.1%. The tests were performed on gels ~ 5 min after preparation.

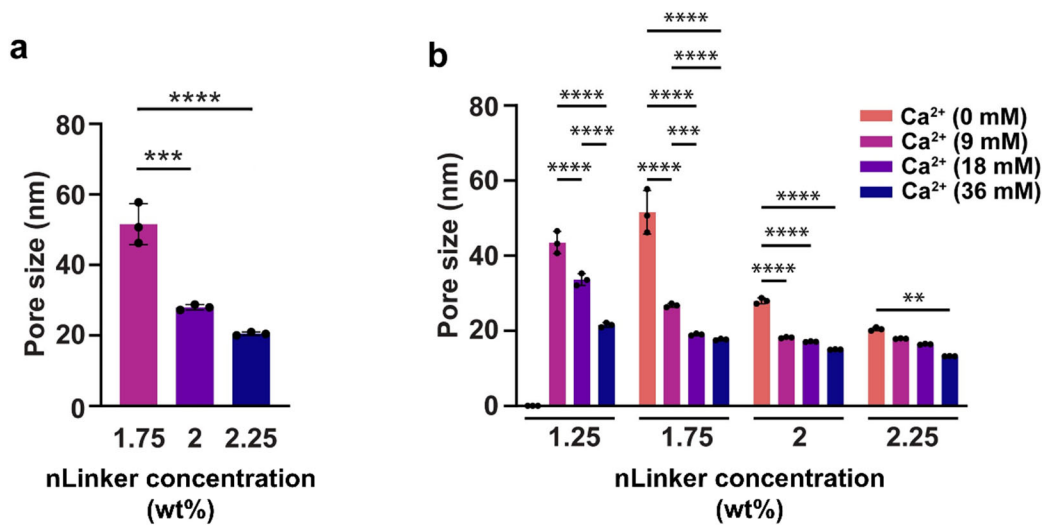

**Fig. S4. Calculated LivGel pore size.** Average pore size of LivGels, containing (a) varying nLinker concentration ( $\text{Ca}^{2+}$  concentration = 0 mM), or (b) varying nLinker concentrations at varying  $\text{Ca}^{2+}$  concentrations (0 - 36 mM), calculated using the storage modulus ( $G'$ ) at constant strain = 1% and frequency = 1 rad  $\text{s}^{-1}$ . The pore size decreased by increasing the nLinker and/or  $\text{Ca}^{2+}$  concentrations. ( $n = 3$ ,  $*p < 0.05$ ,  $**p < 0.01$ ,  $***p < 0.001$ ,  $****p < 0.0001$ ).

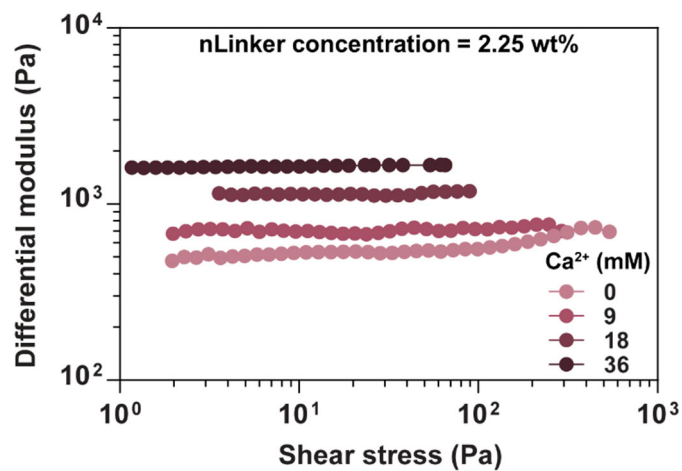

**Fig. S5. Differential modulus ( $K'$ ) versus oscillatory shear stress** for the NCH, containing 2.25 wt.% of nLinker loaded with varying  $\text{Ca}^{2+}$  concentrations. The  $\text{Ca}^{2+}$ -loaded NCH were not strain-stiffening.

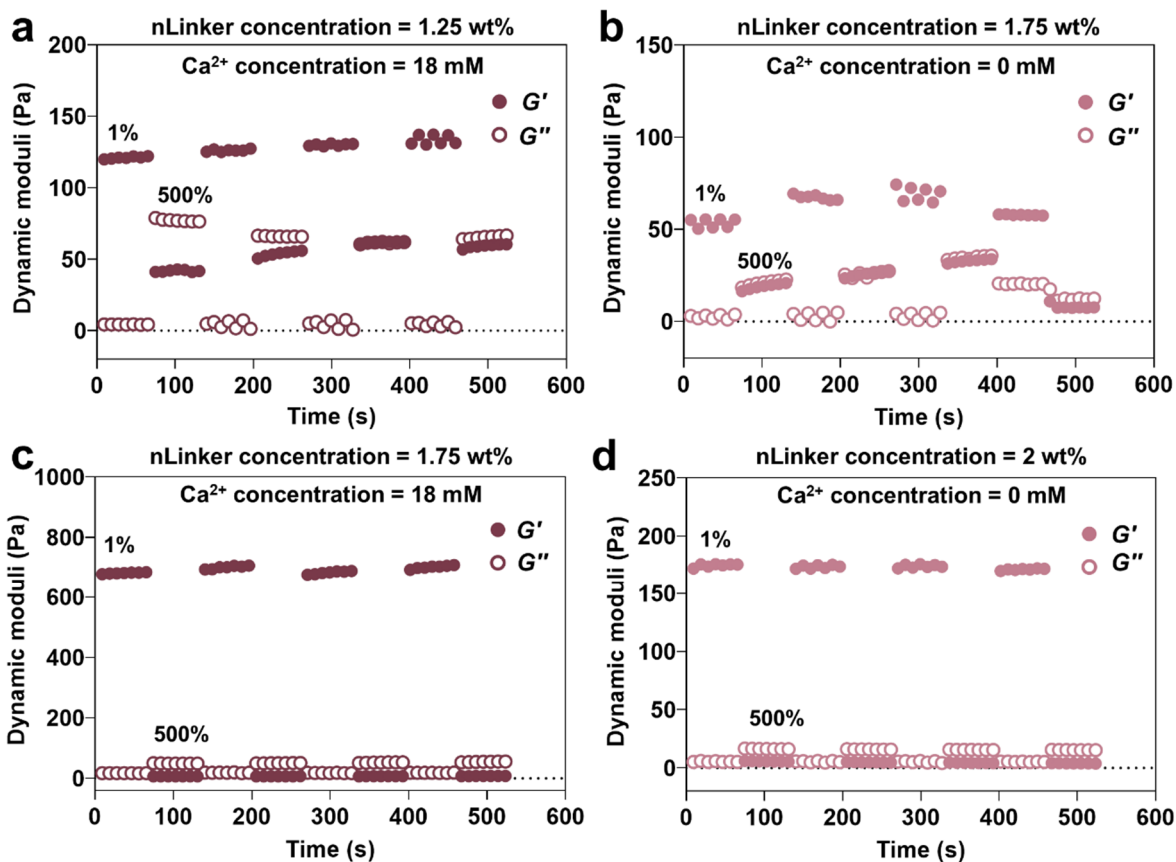

**Fig. S6. Oscillatory strain amplitude tests at alternating low (1%)-high (500%) strain cycles, conducted on the LivGels, containing (a) 1.25 wt.% of nLinker with 18 mM of  $\text{Ca}^{2+}$ , 1.75 wt.% of nLinker with (b) 0 mM of  $\text{Ca}^{2+}$  or (c) 18 mM of  $\text{Ca}^{2+}$ , or 2 wt.% of nLinker with (d) 0 mM of  $\text{Ca}^{2+}$ .**
